# Supplementary material
Source: publisher figshare collection journal article supplement (https://gsajournals.figshare.com/ndownloader/files/16376060)
Supplement: Supplementary file 1 [file 16376060]

## Sheet: Sheet1
Source	Target
Ksp1	Sec2
Ksp1	Atg1
Ksp1	Dma1
Ksp1	Kog1
Ksp1	Tor1
Kog1	Tor1
Ksp1	Crm1
Ksp1	Whi3
Kog1	Tor1
Sec2	Sec2
Atg1	Atg1
Whi3	Whi3
Ksp1	Rpn4
Ksp1	Cdc28
Ksp1	Pre9
Ksp1	Ira2
Rpn4	Whi3
Cdc28	Rpn4
Pre9	Rpn4
Pre9	Ira2
Rpn4	Ira2
Pbp1	Ino4
Pbp1	Bre5
Bre5	Bre5
Pbp1	Pbp4
Pbp4	Lsm12
Pbp1	Lsm12
Pbp1	Dhh1
Pbp1	Edc3
Igo1	Lsm12
Igo1	Pbp4
Pbp1	Igo1
Dhh1	Igo1
Pbp1	Xrn1
Pbp1	Crm1
Pbp1	Pab1
Crm1	Pab1
Dhh1	Xrn1
Pbp4	Edc3
Dhh1	Edc3
Edc3	Edc3
Edc3	Dcp2
Dhh1	Dcp2
Dcp2	Dcp1
Dhh1	Dcp1
Dhh1	Pat1
Dcp2	Pat1
Dhh1	Lsm1
Dhh1	Lsm2
Dhh1	Lsm7
Lsm2	Lsm1
Lsm2	Lsm7
Lsm1	Dcp2
Lsm1	Pat1
Lsm1	Lsm7
Lsm7	Pat1
Dhh1	Elm1
Elm1	Elm1
Dhh1	Tif2
Dhh1	Ngr1
Pat1	Stm1
Dhh1	Stm1
Dhh1	Ccr4
Ccr4	Lsm1
Ste20	Dcp2
Ste20	Ste11
Ste11	Ste11
Ste20	Ste4
Ste11	Ste4
Ste11	Ste7
Ste20	Ste12
Ste12	Ste11
Ste20	Boi1
Ste20	Bem1
Boi1	Bem1
Ste20	Cln2
Bem1	Cln2
Cln2	Cla4
Lte1	Bem1
Ste20	Lte1
Ste20	Cla4
Ste20	Cdc42
Cla4	Cdc42
Cdc42	Lte1
Cdc42	Msb2
Ste20	Msb2
Ste20	Hog1
Hog1	Msb2
Tif4631	Caf20
Tif4631	Tif2
Tif4631	Tif1
Tif4631	Prp11
Tif4631	Cbf5
Cbf5	Sbp1
Cbf5	Cbc2
Tif4631	Cbc2
Tif4631	Sbp1
Tif4631	Pab1
Pab1	Cbc2
Pab1	Sbp1
Pab1	Cdc33
Tif4631	Cdc33
Pab1	Sgn1
Pab1	Sto1
Tif4631	Sto1
Sto1	Cdc33
Tif4631	Pub1
Pub1	Sgn1
Sgn1	Pab1
Tif4631	Sgn1
Tor1	Pat1
Tor1	Sch9
Tor1	Vps41
